# Supplementary material for: The Influence of Political Ideology on Fake News Belief: The Portuguese Case
Source: MDPI journal article supplement (doi:10.3390/publications9020023), 2021-05-27
Supplement: s1 [file s1]

Archive with 1 entries (1 files):
- publications-1136381-supplementary.pdf
