# Supplementary material for: The Influence of Political Ideology on Fake News Belief: The Portuguese Case
Source: MDPI journal article supplement (doi:10.3390/publications9020023), 2021-05-27
Supplement: s1 [file s1 › publications-1136381-supplementary.pdf]

## Supplementary

**Table S1.** Fake news and real news headlines that were used in the questionnaire

| Headline                                                                                                       | Type     |      |           |      | Adapted from:                                               |
|----------------------------------------------------------------------------------------------------------------|----------|------|-----------|------|-------------------------------------------------------------|
|                                                                                                                | Pro-left |      | Pro-right |      |                                                             |
|                                                                                                                | Fake     | Real | Fake      | Real |                                                             |
| The PCP obliges its deputies to donate part of their salary to the party                                       |          |      |           | ✓    | <a href="https://bit.ly/2YZJTaj">https://bit.ly/2YZJTaj</a> |
| Public investment of ‘Geringonça’ will be below the last year of the PSD / CDS Government                      |          |      |           | ✓    | <a href="https://bit.ly/2OiaxcO">https://bit.ly/2OiaxcO</a> |
| “In these four years, we had the biggest tax burden ever”                                                      |          |      |           | ✓    | <a href="https://bit.ly/3cUffHU">https://bit.ly/3cUffHU</a> |
| ANTRAM spokesman is a member of the PS and was appointed to two positions by the current Government            |          |      |           | ✓    | <a href="https://bit.ly/3jC6tQg">https://bit.ly/3jC6tQg</a> |
| Costa's new government has had the most rulers since 1976                                                      |          |      |           | ✓    | <a href="https://bit.ly/36QnMaY">https://bit.ly/36QnMaY</a> |
| PSD deputy calls “crap” to the sexual orientation class and motivates BE's complaint                           |          | ✓    |           |      | <a href="https://bit.ly/36Qo7KM">https://bit.ly/36Qo7KM</a> |
| In 28 years, there has never been so few unemployed.                                                           |          | ✓    |           |      | <a href="https://bit.ly/3aIsfhh">https://bit.ly/3aIsfhh</a> |
| Bloco is the only parliamentary party with accounts without irregularities                                     |          | ✓    |           |      | <a href="https://bit.ly/3jumgAi">https://bit.ly/3jumgAi</a> |
| Son of Durão Barroso was hired by Banco de Portugal “by invitation and without tender”                         |          | ✓    |           |      | <a href="https://bit.ly/3juxVPD">https://bit.ly/3juxVPD</a> |
| 40 years ago the PSD disapproved the law that created the SNS                                                  |          | ✓    |           |      | <a href="https://bit.ly/3jC8koc">https://bit.ly/3jC8koc</a> |
| With the ‘Geringonça’ in power, the price of a barrel of oil fell by 50% while the price of diesel rose by 40% |          |      | ✓         |      | <a href="https://bit.ly/3q2GNP8">https://bit.ly/3q2GNP8</a> |
| Catarina Martins defends RSI of 750 euros "for gypsies, migrants and others"                                   |          |      | ✓         |      | <a href="https://bit.ly/3cP4PcB">https://bit.ly/3cP4PcB</a> |
| Joacine Katar Moreira of the Livre party only started to stutter in this election campaign                     |          |      | ✓         |      | <a href="https://bit.ly/3p1i9gj">https://bit.ly/3p1i9gj</a> |
| PAN electoral program “proposes forgiveness for sexual violators”                                              |          |      | ✓         |      | <a href="https://bit.ly/3cS9RoF">https://bit.ly/3cS9RoF</a> |
| Socialist Party does not want the Portuguese to know who are the politicians who receive lifetime grants       |          |      | ✓         |      | <a href="https://bit.ly/3cOWdTn">https://bit.ly/3cOWdTn</a> |
| Joacine Katar Moreira is the first black female deputy in Portugal                                             | ✓        |      |           |      | <a href="https://bit.ly/3oWMooR">https://bit.ly/3oWMooR</a> |

|                                                                                                |   |                                                             |
|------------------------------------------------------------------------------------------------|---|-------------------------------------------------------------|
| Statistics Portugal: More than half of the jobs created since 2015, have salaries above 1200 € | ✓ | <a href="https://bit.ly/3a0jrE7">https://bit.ly/3a0jrE7</a> |
| Rui Rio's PSD also has a family group in political positions                                   | ✓ | <a href="https://bit.ly/3jvJC8N">https://bit.ly/3jvJC8N</a> |
| PSD voted against reducing VAT on electricity, which it now also proposes                      | ✓ | <a href="https://bit.ly/3q5uLEK">https://bit.ly/3q5uLEK</a> |
| Government reduced SNS debts to hospital suppliers by 50%                                      | ✓ | <a href="https://bit.ly/3d0LncK">https://bit.ly/3d0LncK</a> |
